# Supplementary material for: Programming effects of peripubertal stress on spatial learning
Source: PubMed Central journal article supplement (PMC7739188; doi:10.1016/j.ynstr.2020.100282), 2020-12-01
Supplement: mmc1.pdf [file mmc1.pdf]

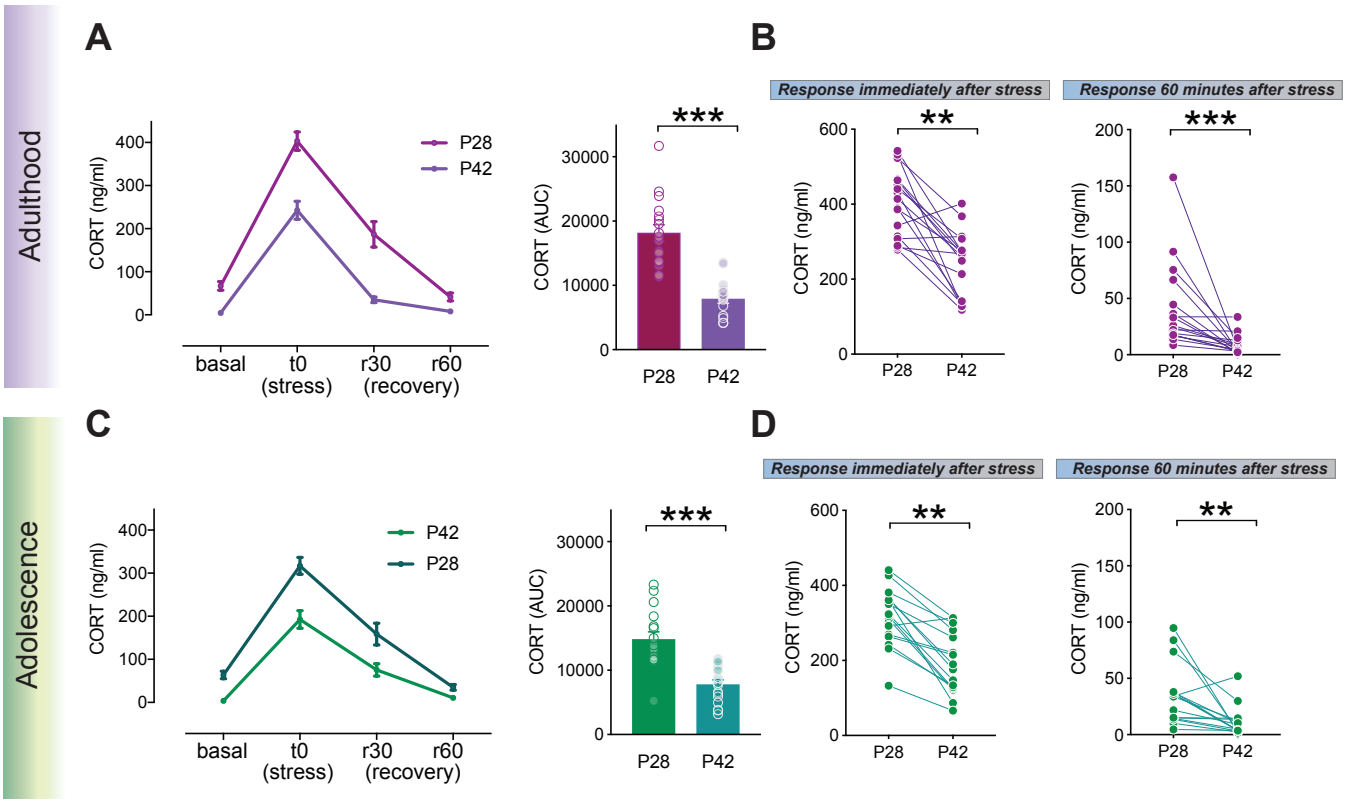

Figure S1
